# Supplementary material for: Aggregation-induced emission-active gold(i) complexes with multi-stimuli luminescence switching
Source: Royal Society of Chemistry journal article supplement (doi:10.1039/c3tc31638f), 2014-01-01
Supplement: c3tc31638f.pdf [file c3tc31638f.pdf]

## Electronic Supplementary Information (ESI)

### Aggregation-induced emission-active gold(I) complexes with multi-stimuli luminescence switching

Jinhua Liang,<sup>a</sup> Zhao Chen,<sup>a</sup> Liangjin Xu,<sup>b</sup> Jiang Wang,<sup>a</sup> Jun Yin,<sup>\*a</sup> Guang-Ao Yu,<sup>a</sup>  
Zhong-Ning Chen,<sup>b</sup> Sheng Hua Liu<sup>\*a</sup>

#### Contents

**Fig. S1** UV spectras of luminogens **1** in different solvents-water mixture solutions.

**Fig. S2** Emission spectra of luminogen **1a** in the THF/water mixtures.

**Fig. S3** Emission spectra of luminogen **1a** in the acetonitrile/water mixtures.

**Fig. S4** Emission spectra of luminogen **1a** in the DMF /water mixtures.

**Fig. S5** Emission spectra of luminogen **1a** in the DMSO/water mixtures.

**Fig. S6** Emission spectra of luminogen **1b** in different solvents-water mixture.

**Fig. S7** Emission spectra of luminogen **1c** in different solvents-water mixture.

**Fig. S8** Emission spectra of luminogen **1** in the 2-methyl tetrahydrofuran at low temperatures (77K).

**Fig. S9** Emission spectra of luminogen **1a** in the THF under different conditions.

**Fig. S10** Time-resolved luminescence of luminogen **1a** in different solvents-water mixture with different fractions of water.

**Fig. S11** Normalized PL spectra of luminogen **1b** and **1c** in different states.

**Fig. S12** XRD patterns of luminogen **1b** and **1c** in different states.

**Table S1** Phosphorescence decays  $\tau$ , photoluminescence quantum yields  $\Phi$ , rate constants for radiative  $k_r$  and nonradiative deactivation  $k_{nr}$  of excited states of the emission maxima of the luminogen **1a** at different mixture solutions and solid-state.

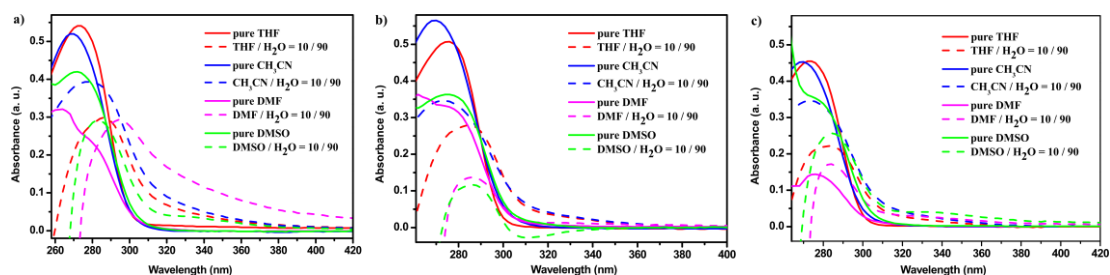

**Fig. S1** UV spectras of luminogens **1** in different solvents-water mixture solutions with  $f_w = 0$  and 90%. Solution concentration: 10  $\mu\text{M}$ .

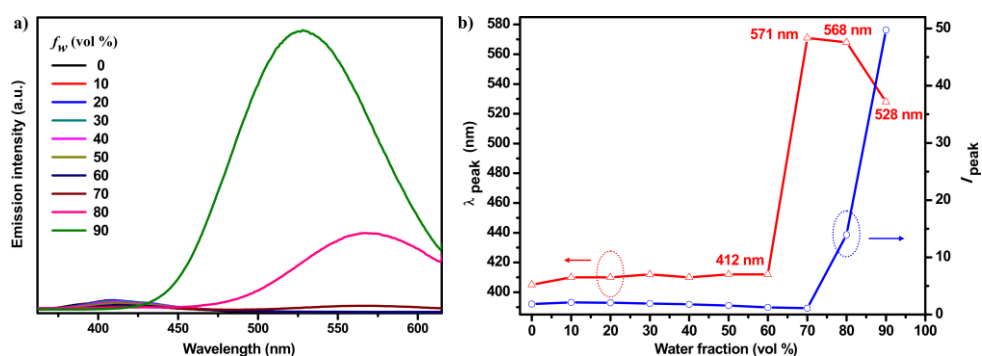

**Fig. S2** a) Emission spectra of luminogen **1a** in the THF/water mixtures. b) Plots of maximum emission wavelength ( $\lambda$ ) and intensity ( $I$ ) of **1a** versus water fraction in the aqueous mixture. Solution concentration: 10  $\mu\text{M}$ . Excitation wavelength: 315 nm.

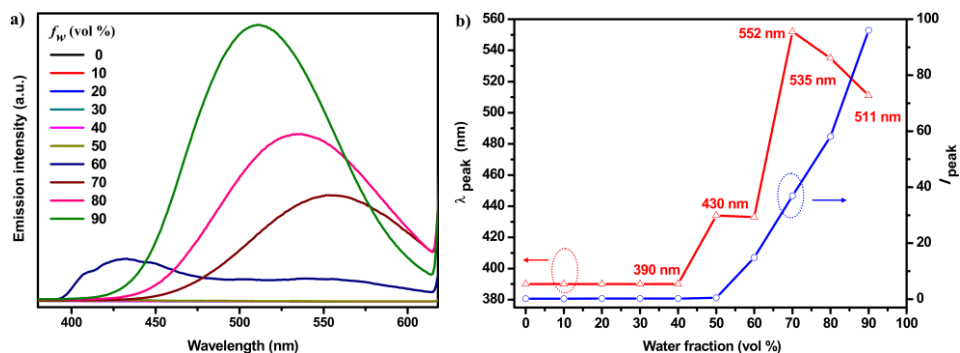

**Fig. S3** a) Emission spectra of luminogen **1a** in the acetonitrile/water mixtures. b) Plots of maximum emission wavelength ( $\lambda$ ) and intensity ( $I$ ) of **1a** versus water fraction in the aqueous mixture. Solution concentration: 10  $\mu\text{M}$ . Excitation wavelength: 315 nm.

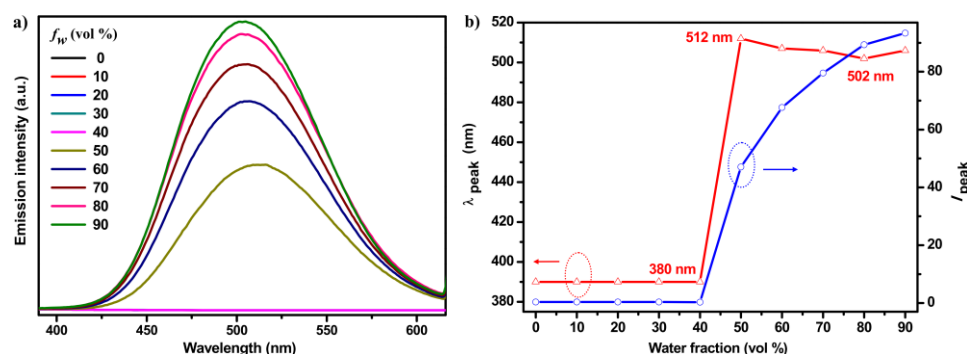

**Fig. S4** a) Emission spectra of luminogen **1a** in the DMF/water mixtures. b) Plots of maximum emission wavelength ( $\lambda$ ) and intensity ( $I$ ) of **1a** versus water fraction in the aqueous mixture. Solution concentration: 10  $\mu$ M. Excitation wavelength: 315 nm.

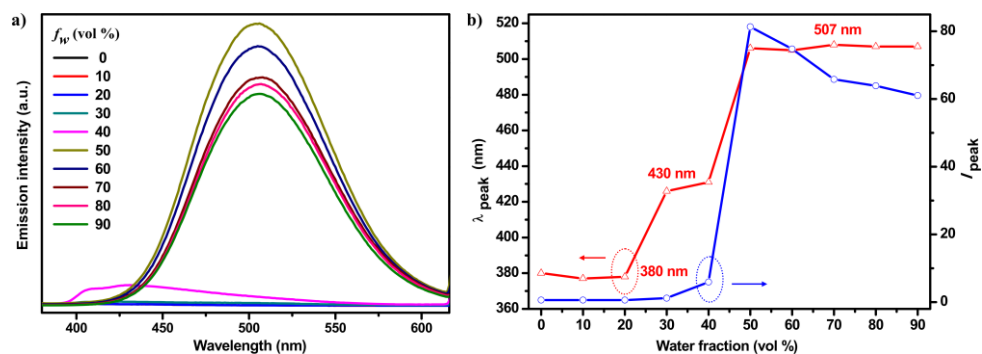

**Fig. S5** a) Emission spectra of luminogen **1a** in the DMSO/water mixtures. b) Plots of maximum emission wavelength ( $\lambda$ ) and intensity ( $I$ ) of **1a** versus water fraction in the aqueous mixture. Solution concentration: 10  $\mu$ M. Excitation wavelength: 315 nm.

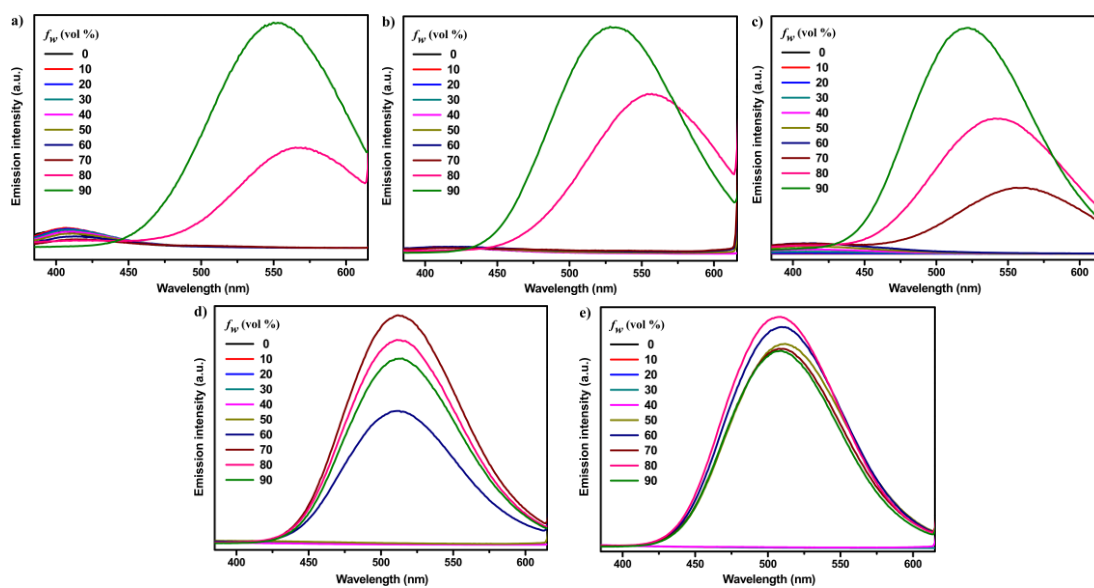

**Fig. S6** Emission spectra of luminogen **1b** in different solvents-water mixture. a) THF, b) acetonitrile, c) acetone, d) DMF, e) DMSO.

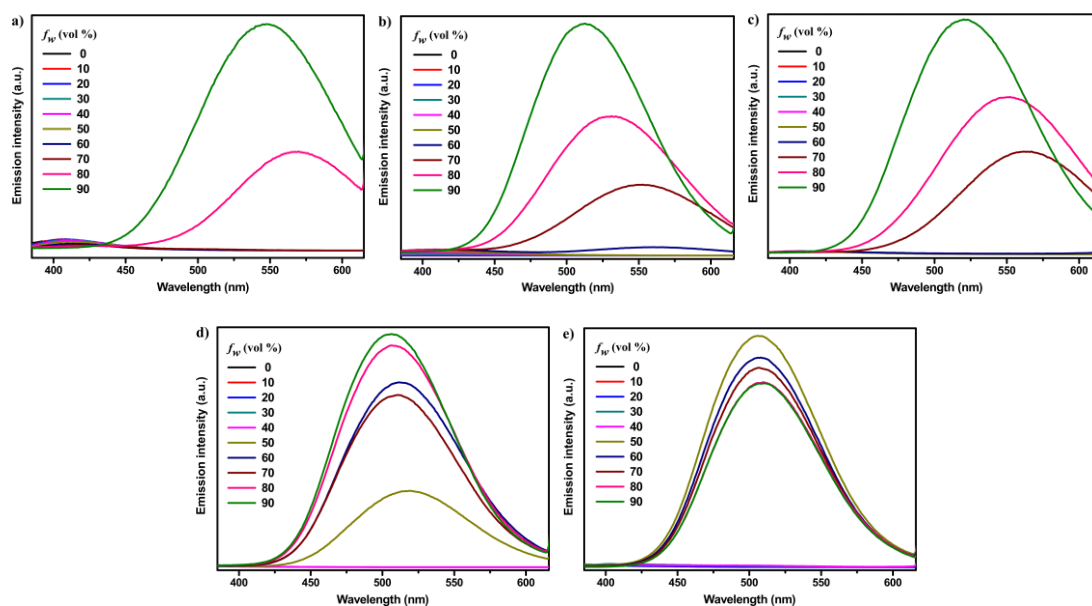

**Fig. S7** Emission spectra of luminogen **1c** in different solvents-water mixture. a) THF, b) acetonitrile, c) acetone, d) DMF, e) DMSO.

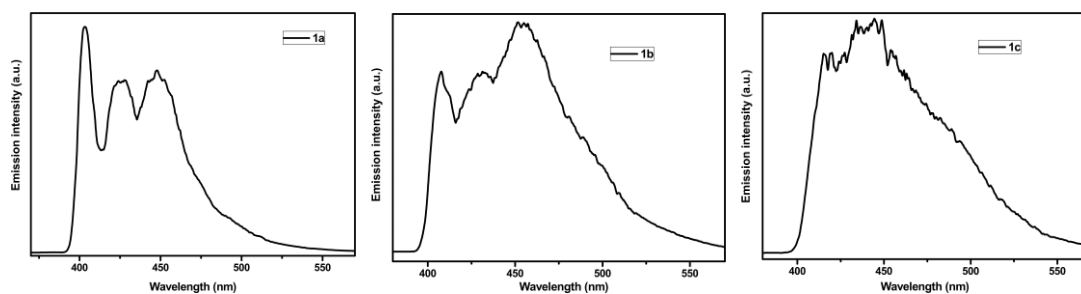

**Fig. S8** Emission spectra of luminogen **1** in the 2-methyl tetrahydrofuran at low temperatures (77K). (Excitation wavelength: 315 nm)

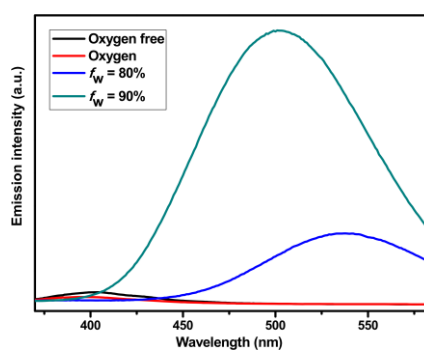

**Fig. S9** Emission spectra of luminogen **1a** in the THF under different conditions. (Excitation wavelength: 315 nm).

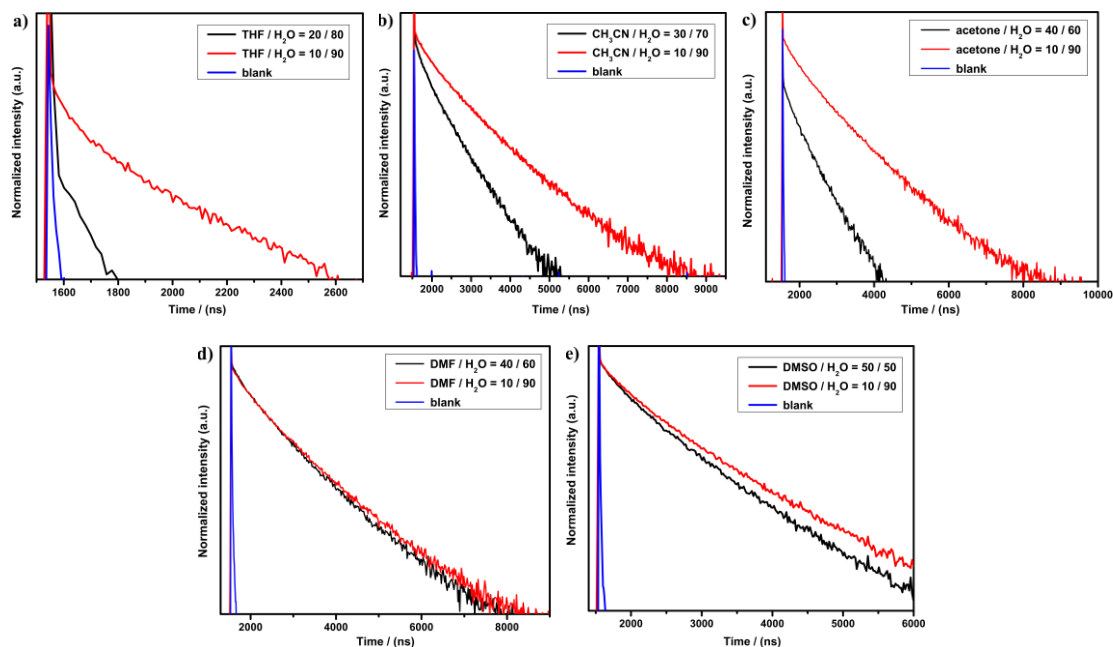

**Fig. S10** Time-resolved luminescence of luminogen **1a** in different solvents-water mixture with different fractions of water (fw): a) THF, b) acetonitrile, c) acetone, d) DMF, e) DMSO. Solution concentration: 10  $\mu$ M. Excitation wavelength: 315 nm.

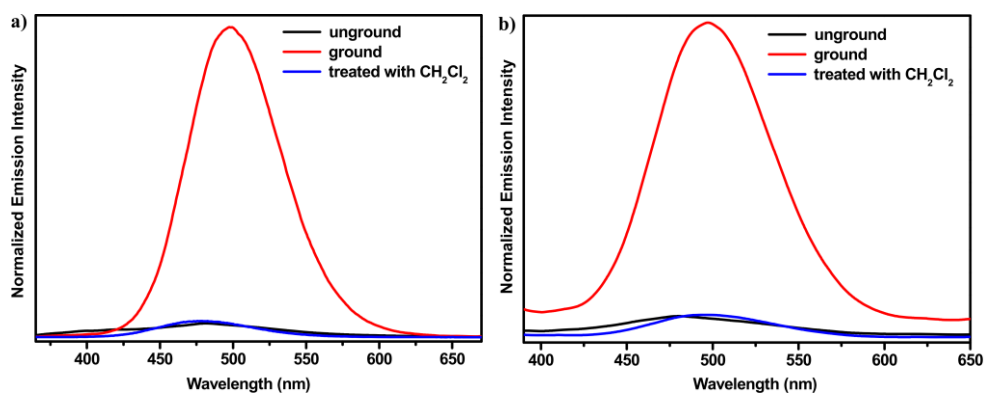

**Fig. S11** Normalized PL spectra of **1b** (a) and **1c** (b) before grinding (black line), after grinding (red line), and after treatment with dichloromethane (blue line). Excitation wavelength: 350 nm.

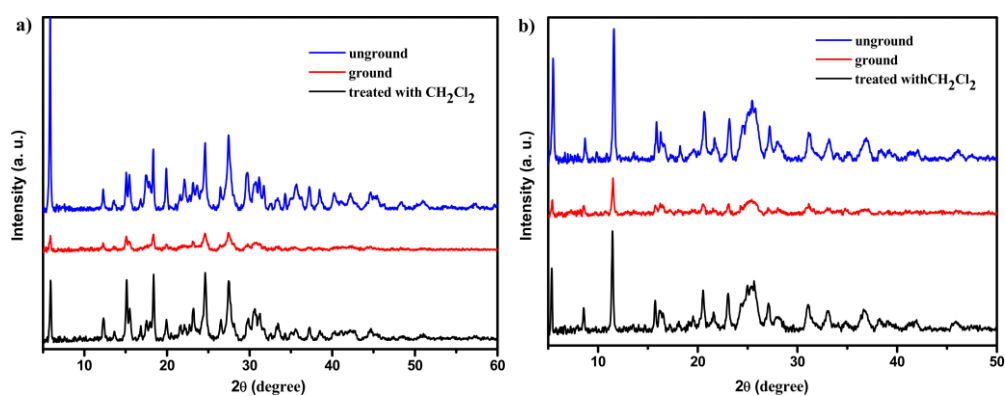

**Fig. S12** XRD patterns of unground, ground and CH<sub>2</sub>Cl<sub>2</sub> treated powders of luminogens **1b** (a) and **1c** (b).

**Table S1** Phosphorescence decays  $\tau$ , photoluminescence quantum yields  $\Phi$ , rate constants for radiative  $k_r$  and nonradiative deactivation  $k_{nr}$  of excited states of the emission maxima of the luminogen **1a** at different mixture solutions and solid-state.

| solvent            | $f_w$    | Excited-state lifetime |       |                      |       |                                    | $\Phi$ | $k_r / \mu s^{-1}{}^b$ | $k_{nr} / \mu s^{-1}{}^b$ |
|--------------------|----------|------------------------|-------|----------------------|-------|------------------------------------|--------|------------------------|---------------------------|
|                    |          | $\tau_1$ ( $\mu s$ )   | $A_1$ | $\tau_2$ ( $\mu s$ ) | $A_2$ | $\langle \tau \rangle$ ( $\mu s$ ) |        |                        |                           |
| tetrahydrofuran    | 90       | 0.06                   | 0.23  | 0.42                 | 0.78  | 0.34                               | 0.78   | 2.29                   | 0.65                      |
|                    | 80       | 0.01                   | 0.82  | 0.13                 | 0.18  | 0.03                               | 0.05   | 1.67                   | 31.73                     |
| acetonitrile       | 90       | 0.36                   | 0.23  | 1.10                 | 0.77  | 0.93                               | 0.84   | 0.90                   | 0.17                      |
|                    | 70       | 0.19                   | 0.23  | 0.62                 | 0.77  | 0.52                               | 0.34   | 0.65                   | 1.26                      |
| acetone            | 90       | 0.36                   | 0.21  | 1.10                 | 0.79  | 0.94                               | 0.99   | 1.05                   | 0.01                      |
|                    | 60       | 0.17                   | 0.17  | 0.58                 | 0.83  | 0.51                               | 0.32   | 0.63                   | 1.34                      |
| dimethyl formamide | 90       | 0.36                   | 0.21  | 1.17                 | 0.79  | 1.00                               | 0.38   | 0.38                   | 0.62                      |
|                    | 60       | 0.36                   | 0.22  | 1.09                 | 0.78  | 0.93                               | 0.01   | 0.01                   | 0.99                      |
| dimethylsulfoxide  | 90       | 0.36                   | 0.25  | 1.15                 | 0.75  | 0.95                               | 0.17   | 0.18                   | 0.88                      |
|                    | 50       | 0.32                   | 0.24  | 0.95                 | 0.76  | 0.80                               | 0.99   | 1.24                   | 0.26                      |
| solid-state        | unground | -                      | -     | -                    | -     | 0.01                               | 0.01   | 1.00                   | 99.00                     |
|                    | ground   | -                      | -     | -                    | -     | 0.77                               | 0.68   | 0.88                   | 0.41                      |

<sup>a</sup> An apparent decay time constant  $\langle \tau \rangle$  was determined by using the relation:  $I = A_1 \exp(-t/\tau_1) + A_2 \exp(-t/\tau_2) + y_0$ , where  $A_1/A_2$  and  $\tau_1/\tau_2$  are the fractions ( $A$ ) and lifetimes ( $\tau$ ). The weighted mean lifetime  $\langle \tau \rangle$  was calculated according to the equation:  $\langle \tau \rangle = (A_1 \tau_1 + A_2 \tau_2) / (A_1 + A_2)$ .

<sup>b</sup> The radiative rate constant  $k_r = \Phi / \langle \tau \rangle$ ; the nonradiative rate constant  $k_{nr} = 1 / \langle \tau \rangle - k_r$ .
